# Supplementary material for: Efficacy and tolerability of the hexanic extract of Serenoa repens compared to tamsulosin in moderate-severe LUTS-BPH patients
Source: PubMed Central journal article supplement (PMC8481292; doi:10.1038/s41598-021-98586-5), 2021-09-29
Supplement: 41598_2021_98586_MOESM1_ESM.pdf [file 41598_2021_98586_MOESM1_ESM.pdf]

Supplementary Information

**Table S1.** Concomitant diseases at baseline by treatment group (iterative matching sample), n (%).

|                                                     | TAM<br>(n = 353) | HESr<br>(n = 384) | p value |
|-----------------------------------------------------|------------------|-------------------|---------|
| <i>Patients with any concomitant illness, n (%)</i> | 131 (37.1)       | 120 (31.2)        | 0.110   |
| High blood pressure                                 | 68 (19.3)        | 60 (15.6)         | 0.228   |
| Dyslipidemia                                        | 55 (15.6)        | 50 (13.0)         | 0.375   |
| Diabetes mellitus                                   | 38 (10.8)        | 32 (8.3)          | 0.318   |
| Other                                               | 8 (2.3)          | 8 (2.1)           | 0.604   |

TAM: tamsulosin; HESr: hexanic extract of *Serenoa repens*

**Table S2.** Patient baseline characteristics by treatment group (propensity score matching sample).

|                                     | TAM |             | HESr |             | p value |
|-------------------------------------|-----|-------------|------|-------------|---------|
|                                     | n   | mean (SD)   | n    | mean (SD)   |         |
| Age, mean (SD) years                | 115 | 63.1 (8.0)  | 114  | 62.7 (8.2)  | 0.713   |
| BMI (Kg/m <sup>2</sup> ), mean (SD) | 113 | 26.9 (2.8)  | 114  | 26.4 (2.6)  | 0.122   |
| IPSS, mean (SD)                     | 128 | 16.7 (4.5)  | 128  | 16.3 (4.9)  | 0.579   |
| IPSS voiding sub-score              | 128 | 9.6 (3.2)   | 128  | 9.3 (3.1)   | 0.448   |
| IPSS storage sub-score              | 128 | 7.1 (2.0)   | 128  | 7.1 (2.6)   | 0.914   |
| Nocturia                            | 128 | 2.4 (0.9)   | 128  | 2.3 (1.0)   | 0.520   |
| BII, mean (SD)                      | 128 | 7.2 (2.2)   | 128  | 7.0 (2.4)   | 0.499   |
| IPSS item 8 (QoL)                   | 128 | 3.5 (1.1)   | 128  | 3.4 (1.1)   | 0.465   |
| Time since diagnosis (years)        | 115 | 0.8 (1.6)   | 114  | 1.3 (3.0)   | 0.094   |
| Qmax (ml/s)                         | 128 | 12.0 (3.4)  | 128  | 12.5 (3.5)  | 0.300   |
| Prostate volume (cm <sup>3</sup> )  | 128 | 49.5 (16.8) | 128  | 47.7 (15.6) | 0.352   |
| PSA (ng/ml)                         | 128 | 2.3 (1.2)   | 128  | 2.3 (1.2)   | 0.932   |

TAM: tamsulosin; HESr: hexanic extract of *Serenoa repens*. BMI: body mass index; IPSS: International Prostate Symptom Score; BII: Benign Prostatic Hyperplasia Impact Index; QoL: quality of life; Qmax: maximum urinary flow rate; PSA: prostate-specific antigen.

**Table S3.** Improvements in symptoms, quality of life, and clinical parameters from baseline to 6-month follow-up by treatment group (propensity score matching sample).

|                                    | TAM |            | HESr |             | p value |
|------------------------------------|-----|------------|------|-------------|---------|
|                                    | n   | Mean (SD)  | n    | Mean (SD)   |         |
| IPSS total                         | 124 | 5.1 (4.6)  | 125  | 4.9 (4.6)   | 0.718   |
| IPSS voiding sub-score             | 124 | 3.0 (3.0)  | 125  | 2.7 (2.9)   | 0.400   |
| IPSS storage sub-score             | 124 | 2.1 (2.1)  | 125  | 2.2 (2.2)   | 0.691   |
| Nocturia                           | 124 | 0.7 (0.9)  | 125  | 0.7 (1.0)   | 0.964   |
| BII total                          | 124 | 2.6 (2.4)  | 125  | 2.4 (2.5)   | 0.494   |
| IPSS item 8                        | 124 | 1.3 (1.2)  | 125  | 1.2 (1.2)   | 0.559   |
| Qmax (ml/sec)                      | 51  | 3.2 (3.6)  | 65   | 3.0 (4.2)   | 0.805   |
| Prostate volume (cm <sup>3</sup> ) | 20  | -1.9 (3.4) | 36   | -2.3 (10.6) | 0.824   |
| PSA (ng/ml)                        | 42  | -0.3 (0.7) | 35   | 0.0 (0.9)   | 0.127   |

TAM: tamsulosin; HESr: hexanic extract of *Serenoa repens*; IPSS: International Prostate Symptom Score; BII: Benign Prostatic Hyperplasia Impact Index; Qmax: maximum urinary flow rate; PSA: prostate-specific antigen.

**Table S4.** Improvements from baseline to 6-month follow-up in symptoms and quality of life scores by treatment arm, in patients with severe (IPSS > 19) baseline symptoms (propensity score matching sample).

|                        | TAM |           | HESr |           | p value |
|------------------------|-----|-----------|------|-----------|---------|
|                        | n   | mean (SD) | n    | mean (SD) |         |
| IPSS total             | 35  | 9.1 (5.3) | 28   | 9.0 (5.4) | 0.929   |
| IPSS voiding sub-score | 35  | 5.6 (3.2) | 28   | 5.3 (3.3) | 0.731   |
| IPSS storage sub-score | 35  | 3.5 (2.6) | 28   | 3.7 (2.5) | 0.799   |
| Nocturia               | 35  | 1.1 (1.1) | 28   | 1.0 (1.2) | 0.633   |
| BII total              | 35  | 3.3 (2.8) | 28   | 3.6 (2.8) | 0.593   |
| IPSS item 8            | 35  | 1.8 (1.2) | 28   | 1.5 (1.3) | 0.306   |
| Qmax (ml/sec)          | 16  | 3.5 (3.1) | 18   | 5.5 (3.9) | 0.103   |

TAM: tamsulosin; HESr: hexanic extract of *Serenoa repens*; IPSS: International Prostate Symptom Score; BII: Benign Prostatic Hyperplasia Impact Index; Qmax: maximum urinary flow rate.

**Table S5.** Reported adverse effects for the study sample overall and by treatment group (propensity score matching sample).

|                            | Overall   | TAM        | HESr     | p value |
|----------------------------|-----------|------------|----------|---------|
|                            | n = 256   | n = 128    | n = 128  |         |
| Any adverse effect         | 24 (9.4%) | 21 (16.4%) | 3 (2.3%) | <0.001* |
| Anejaculation              | 11 (4.3%) | 11 (8.6%)  | 0        | 0.002*  |
| Reduced ejaculatory volume | 11 (3.4%) | 10 (7.8%)  | 1 (0.8%) | 0.014*  |
| Erectile dysfunction       | 2 (0.8%)  | 1 (0.8%)   | 1 (0.8%) | 1.000   |
| Orthostatic hypotension    | 3 (1.2%)  | 3 (2.3%)   | 0        | 0.247   |
| Reduced libido             | 4 (1.6%)  | 3 (2.3%)   | 1 (0.8%) | 0.622   |
| Dizziness                  | 1 (0.4%)  | 1 (0.8%)   | 0        | 1.000   |

TAM: tamsulosin; HESr: hexanic extract of *Serenoa repens*

\*Statistically significant

Supplementary figure

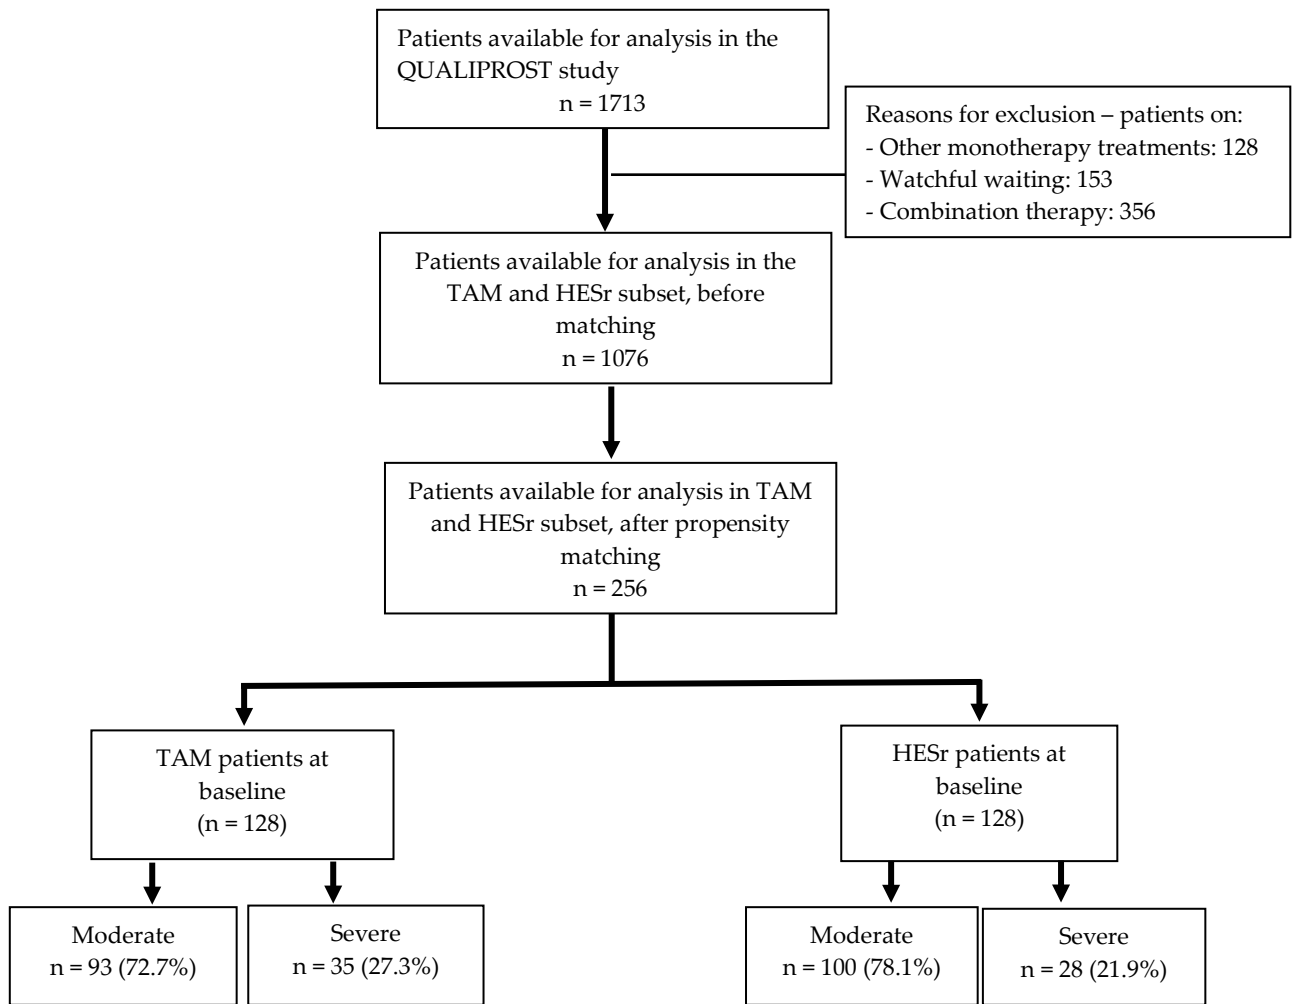

**Figure S1.** Study flow-chart: propensity matching based on IPSS (total, voiding and storage sub-scores, and item 8) and BII scores, maximum urinary flow (Qmax), prostate-specific antigen (PSA), and prostate volume at baseline.

TAM: tamsulosin; HESr: hexanic extract of *Serenoa repens*

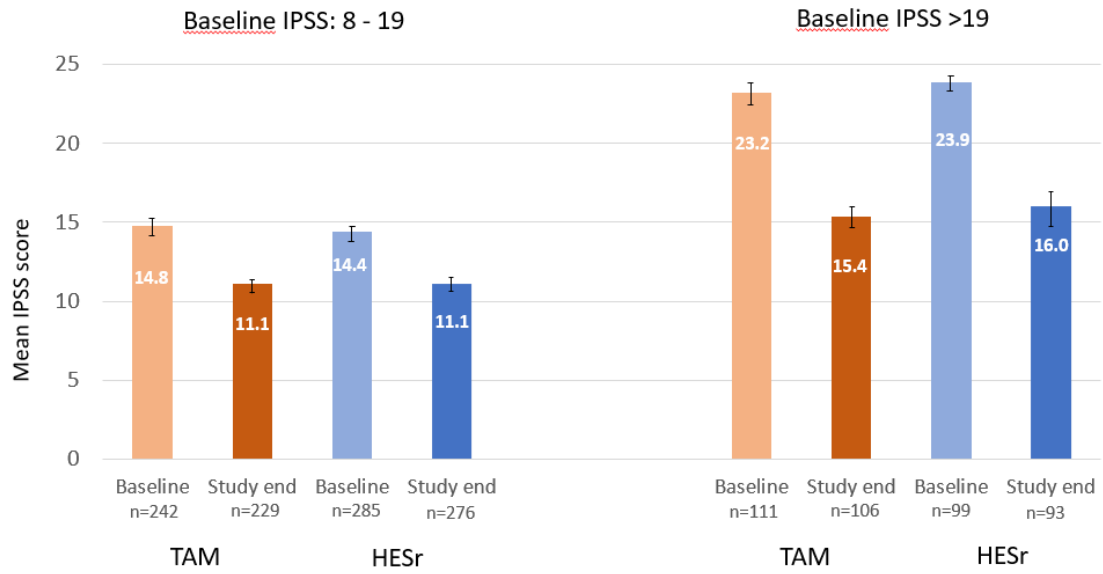

**Figure S2.** Mean (95% CI) IPSS total score at baseline and study end (6 months) for the treatment groups based on baseline symptom severity (iterative matching sample).

TAM: tamsulosin; HESr: hexanic extract of *Serenoa repens*; IPSS: International Prostate Symptom Score.

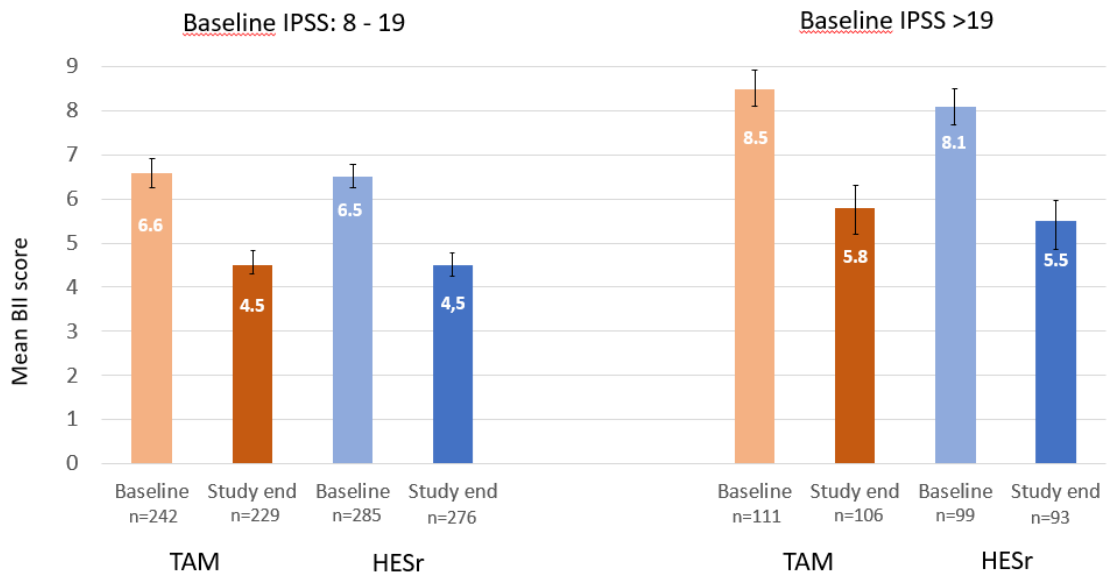

**Figure S3.** Mean (95% CI) BII score at baseline and study end (6 months) for the treatment groups based on baseline symptom severity (iterative matching sample).

TAM: tamsulosin; HESr: hexanic extract of *Serenoa repens*; IPSS: International Prostate Symptom Score; BII: Benign Prostatic Hyperplasia Impact Index.

## Appendix

The following investigators participated in the QUALIPROST Study Group:

*A Coruña*: Dr. L. Busto Castañón; Dr. J.E. Duarte Novo; Dr. M. Montes Couceiro; Dr. A. Rodríguez Alonso; *Alicante*: Dr. J.A. Canovas Ivorra; Dr. C. López López; Dr. L. Prieto Chaparro; *Almería*: Dr. F. Gómez Berjón; Dr. J. Hortelano Parras; *Asturias*: Dr. A. M. Huescar; Dr. P.L. Muntañola Armora; *Badajoz*: Dr. E. Godoy Rubio; Dr. J. Mariño del Real; *Barcelona*: Dr. J. Armona Mani; Dr. F.J. Blasco Casares; Dr. S. Bucar Terrades; Dr. Ll. Cortadellas Angel; Dr. J. Fernández Zuazu; Dr. J.M. Malet Carreras; Dr. S. Mando Dakkar; Dr. J.M. Prats Puig; Dr. M. Puyol Pallás; Dr. J.A. Romero Martín; Dr. J. Sáenz de Cabezón Martí; Dr. J. Sánchez Macías; Dr. C. Vargas Blasco; Dr. J.M. Vayreda Martija; *Bilbao*: Dr. J.A. Gallego Sánchez; Dr. N. Prieto Ugidos; *Cádiz*: Dr. J.M. Arroyo Maestre; Dr. S. Garrido Insua; Dr. A. Gutiérrez de Pablo; Dr. M. Marmol Ruíz; Dr. F. Reyes Martínez; *Castellón*: Dr. J. Beltrán Persiva; Dr. L. Monzonis Rey; Dr. J. Palacios Castañeda; *Ciudad Real*: Dr. N. Jiménez López-Lucendo; Dr. D. Rodríguez Leal; *Córdoba*: Dr. J.C. Regueiro López; *Granada*: Dr. M. Cabezas Zamora; *Guipúzcoa*: Dr. G. Garmendia Olaizola; Dr. J.A. Rodríguez Andrés; *Jaén*: Dr. J. Jiménez Verdejo; Dr. E.J. Zarate Rodríguez; *León*: Dr. S.C. Gómez Cisneros; Dr. M. Lozano Rebollo; *Lleida*: Dr. J. Cortada Robert; Dr. L.M. Flavian Domenech; *Logroño*: Dr. A. Fernández Fernández; *Lugo*: Dr. F.J. Neira Pampin; *Madrid*: Dr. A. Abdallah Merhi; Dr. F. Arias Funes; Dr. I.T. Castellón Vela; Dr. J.M. Duarte Ojeda; Dr. M.J. García-Matres Cortés; Dr. J.F. Hermina Gutierrez; Dr. J.J. López-Tello García; Dr. C. Martín García; Dr. B. M.El-Awadeh; Dr. J.D. Rendón Sánchez; Dr. R. Rodríguez-Patron Rodríguez; Dr. J.C. Ruíz de la Roja; Dr. J. Vallejo Herrador; Dr. D. Vázquez Alba; *Málaga*: Dr. A. Bonilla Maldonado; Dr. J.M. Fernández Montero; Dr. A. Galacho Bech; Dr. C. Marchal Escalona; Dr. P. Rodero García; Dr. G. Sanz; Dr. J.D. Vázquez Cervilla; *Murcia*: Dr. G. Server Pastor; *Pontevedra*: Dr. D. Jamardo González; Dr. A. Selas Pérez; *Salamanca*: Dr. F. Díaz Alférez; Dr. M.F. Lorenzo Gómez; *Santander*: Dr. J.A. Portillo Martín; *Sevilla*: Dr. F.J. Giráldez Puig; Dr. M.A. Gutiérrez González; Dr. J.I. Huesa Martínez; Dr. Y. Ismail Tomaizeh; Dr. J. Leal Arenas; Dr. J. Martín Calero; Dr. J.L. Moyano Calvo; Dr. A. Ortiz Gámiz; Dr. J.M. Poyato Galán; Dr. J.A. Valero Puerta; Dr. E. Vilches Cocovi; *Tarragona*: Dr. P.L. Álvarez de la Red; Dr. J. Benagues Pamies; Dr. M. Prados Saavedra; *Tenerife*: Dr. T. Concepción Masip; Dr. C. Gómez de Segura Melcon; Dr. E. González de Chaves; Dr. J. Postius Robert; *Toledo*: Dr. F. Álvarez Fernández; Dr. A. Iglesias Justo; Dr. A. Melchor Galán; *Valencia*: Dr. J.E. Blasco Alfonso; Dr. M.A. Bonillo García; Dr. A. Collado Serra; Dr. J.A. García Cebrián; Dr. L.García Reboll; Dr. Y. Pallás Costa; Dr. M.J. Sánchez Sanchiz; Dr. J. Santamaría Meseguer; *Zaragoza*: Dr. A. García de Jalón Martínez; Dr. J.M. Gil Fabra; Dr. F. Monzón Alebesque; Dr. A. Ucar Terren.
